# Supplementary material for: Positive Correlation of Triacylglycerols with Increased Chain Length and Unsaturation with ω-O-Acylceramide and Ceramide-NP as Well as Acidic pH in the Skin Surface of Healthy Korean Adults
Source: Metabolites. 2022 Dec 24;13(1):31. doi: 10.3390/metabo13010031 (PMC9861786; doi:10.3390/metabo13010031)
Supplement: Supplementary file 1 [file metabolites-13-00031-s001.zip › Supplementary Table.pdf]

**Table S1.** Top10 lipid species according to betweenness centrality

| Species         | Lipid class | Betweenness Centrality | Closeness Centrality | Degree | Stress  | Topological Coefficient |
|-----------------|-------------|------------------------|----------------------|--------|---------|-------------------------|
| TG 52:3(16:0)   | TG          | 0.097                  | 0.465                | 57     | 1017360 | 0.147                   |
| TG 52:5(18:3)   | TG          | 0.080                  | 0.481                | 54     | 680648  | 0.193                   |
| TG 54:2(18:2)   | TG          | 0.068                  | 0.457                | 49     | 719178  | 0.170                   |
| TG 52:4(18:2)   | TG          | 0.064                  | 0.441                | 58     | 807712  | 0.165                   |
| 1-O-E(16)NS(34) | 1-O-ENS     | 0.064                  | 0.501                | 79     | 814332  | 0.216                   |
| 1-O-E(14)NS(42) | 1-O-ENS     | 0.056                  | 0.499                | 75     | 694326  | 0.212                   |
| TG 52:5(16:1)   | TG          | 0.046                  | 0.467                | 46     | 485966  | 0.304                   |
| ADS d18:0/28:0  | ADS         | 0.043                  | 0.481                | 44     | 833362  | 0.243                   |
| TG 50:3(18:3)   | TG          | 0.042                  | 0.463                | 44     | 439480  | 0.341                   |
| NS d18:1/19:0   | NS          | 0.040                  | 0.503                | 58     | 464838  | 0.206                   |

TG: triacylglycerol

Non-hydroxy fatty acid (FA) [N],  $\alpha$ -hydroxy FA [A], 1-O-acyl FA [1-O-E], Dihydro-sphingosine [DS], Sphingosine [S].
